# Supplementary material
Source: MDPI journal article supplement (https://www.mdpi.com/2311-5637/9/12/1002)
Supplement: s1 [file s1]

## Supplementary Materials

**Table S1.** Worksheet of experiment settings together with the results of the experiments of the first DoE.

| Exp No | Exp Name | Run Order | Incl/Excl | Trace Elements | Vitamins | Iron | Mix 2    | Mix3     | Mix4     | Mix1     | OD <sub>600nm</sub> <sup>1</sup> | Td <sup>1</sup> |
|--------|----------|-----------|-----------|----------------|----------|------|----------|----------|----------|----------|----------------------------------|-----------------|
| 1      | N1       | 8         | Incl      | 1              | 1        | 1    | 0.333333 | 0        | 0.333333 | 0.333333 | 1.3                              | 3.29            |
| 2      | N2       | 12        | Incl      | 20             | 1        | 1    | 1        | 0        | 0        | 0        | -                                | -               |
| 3      | N3       | 20        | Incl      | 20             | 1        | 1    | 0        | 1        | 0        | 0        | -                                | -               |
| 4      | N4       | 10        | Incl      | 20             | 1        | 1    | 0        | 0        | 1        | 0        | 0.7                              | 14.77           |
| 5      | N5       | 16        | Incl      | 20             | 1        | 1    | 0        | 0        | 0        | 1        | 0.8                              | 6.00            |
| 6      | N6       | 18        | Incl      | 1              | 10       | 1    | 1        | 0        | 0        | 0        | -                                | -               |
| 7      | N7       | 15        | Incl      | 1              | 10       | 1    | 0        | 0        | 1        | 0        | -                                | -               |
| 8      | N8       | 9         | Incl      | 1              | 10       | 1    | 0        | 0        | 0        | 1        | 1.1                              | 3.22            |
| 9      | N9       | 19        | Incl      | 20             | 10       | 1    | 0        | 1        | 0        | 0        | 1.3                              | 4.52            |
| 10     | N10      | 14        | Incl      | 20             | 10       | 1    | 0.333333 | 0        | 0.333333 | 0.333333 | 0.8                              | 1.47            |
| 11     | N11      | 17        | Incl      | 1              | 1        | 10   | 1        | 0        | 0        | 0        | 0.7                              | 9.60            |
| 12     | N12      | 7         | Incl      | 1              | 1        | 10   | 0        | 1        | 0        | 0        | 0.8                              | 0.06            |
| 13     | N13      | 6         | Incl      | 1              | 1        | 10   | 0        | 0        | 1        | 0        | -                                | -               |
| 14     | N14      | 22        | Incl      | 1              | 1        | 10   | 0        | 0        | 0        | 1        | 5.1                              | 0.69            |
| 15     | N15      | 11        | Incl      | 20             | 1        | 10   | 0.333333 | 0        | 0.333333 | 0.333333 | 0.8                              | 10.80           |
| 16     | N16      | 23        | Incl      | 1              | 10       | 10   | 0        | 1        | 0        | 0        | 1                                | 0.35            |
| 17     | N17      | 4         | Incl      | 1              | 10       | 10   | 0        | 0.333333 | 0.333333 | 0.333333 | 1.5                              | 2.41            |
| 18     | N18      | 3         | Incl      | 20             | 10       | 10   | 1        | 0        | 0        | 0        | 1.2                              | 1.57            |
| 19     | N19      | 24        | Incl      | 20             | 10       | 10   | 0        | 0        | 1        | 0        | -                                | -               |
| 20     | N20      | 21        | Incl      | 20             | 10       | 10   | 0        | 0        | 0        | 1        | 1.3                              | 5.15            |
| 21     | N21      | 1         | Incl      | 1              | 5,5      | 1    | 0        | 1        | 0        | 0        | 0.9                              | 3.63            |
| 22     | N22      | 5         | Incl      | 20             | 5,5      | 10   | 0        | 1        | 0        | 0        | 1.3                              | 3.79            |
| 23     | N23      | 2         | Incl      | 10.5           | 5.5      | 5.5  | 0.25     | 0.25     | 0.25     | 0.25     | 0.5                              | 0.63            |
| 24     | N24      | 13        | Incl      | 10.5           | 5.5      | 5.5  | 0.25     | 0.25     | 0.25     | 0.25     | 0.9                              | 3.35            |

<sup>1</sup>Some values are missing because the minimum threshold for the OD<sub>600nm</sub> reading was not reached.

**Table S2.** ANOVA table of the two responses of the first DoE.

| OD                              | DF        | SS              | MS (variance) | F                 | p            | SD       |
|---------------------------------|-----------|-----------------|---------------|-------------------|--------------|----------|
| Total                           | 18        | 44.08           | 2.44889       |                   |              |          |
| Constant                        | 1         | 26.8889         | 26.8889       |                   |              |          |
|                                 |           |                 |               |                   |              |          |
| Total corrected                 | 17        | 17.1911         | 1.01124       |                   |              | 1.00561  |
| Regression                      | 1         | 1.20238         | 1.20238       | 1.20323           | <b>0.289</b> | 1.09653  |
| Residual                        | 16        | 15.9887         | 0.999296      |                   |              | 0.999648 |
|                                 |           |                 |               |                   |              |          |
| Lack of Fit<br>(Model error)    | 15        | 15.9087         | 1.06058       | 13.2573           | <b>0.213</b> | 1.02985  |
| Pure error<br>(Replicate error) | 1         | 0.08            | 0.08          |                   |              | 0.282843 |
|                                 |           |                 |               |                   |              |          |
|                                 | N = 18    | Q2 = 0.050      |               | Cond. no. = 1.029 |              |          |
|                                 | DF = 16   | R2 = 0.070      |               | RSD = 0.9996      |              |          |
|                                 | Comp. = 1 | R2 adj. = 0.012 |               |                   |              |          |
|                                 |           |                 |               |                   |              |          |
| Duplication time                | DF        | SS              | MS (variance) | F                 | p            | SD       |
| Total                           | 18        | 581.295         | 32.2942       |                   |              |          |
| Constant                        | 1         | 315.005         | 315.005       |                   |              |          |
|                                 |           |                 |               |                   |              |          |
| Total corrected                 | 17        | 266.29          | 15.6641       |                   |              | 3.95779  |
| Regression                      | 2         | 102.32          | 51.1599       | 4.68011           | <b>0.026</b> | 7.15261  |
| Residual                        | 15        | 163.97          | 10.9313       |                   |              | 3.30626  |
|                                 |           |                 |               |                   |              |          |
| Lack of Fit<br>(Model error)    | 14        | 160.271         | 11.4479       | 3.0947            | <b>0.421</b> | 3.38348  |
| Pure error<br>(Replicate error) | 1         | 3.6992          | 3.6992        |                   |              | 1.92333  |
|                                 |           |                 |               |                   |              |          |
|                                 | N = 18    | Q2 = 0.128      |               | Cond. no. = 1.144 |              |          |
|                                 | DF = 15   | R2 = 0.384      |               | RSD = 3.306       |              |          |
|                                 | Comp. = 2 | R2 adj. = 0.302 |               |                   |              |          |
|                                 |           |                 |               |                   |              |          |

**Table S3.** ANOVA table of the two responses of the second DoE.

| <b>OD600nm</b>                  | <b>DF</b> | <b>SS</b>       | <b>MS (variance)</b> | <b>F</b>          | <b>p</b>     | <b>SD</b> |
|---------------------------------|-----------|-----------------|----------------------|-------------------|--------------|-----------|
| Total                           | 24        | 263.4           | 10.975               |                   |              |           |
| Constant                        | 1         | 249.615         | 249.615              |                   |              |           |
|                                 |           |                 |                      |                   |              |           |
| Total corrected                 | 23        | 13.785          | 0.599348             |                   |              | 0.774176  |
| Regression                      | 14        | 11.4571         | 0.818363             | 3.16388           | <b>0.044</b> | 0.904634  |
| Residual                        | 9         | 2.32792         | 0.258658             |                   |              | 0.508584  |
|                                 |           |                 |                      |                   |              |           |
| Lack of Fit<br>(Model error)    | 7         | 1.34792         | 0.192561             | 0.392981          | <b>0.852</b> | 0.438817  |
| Pure error<br>(Replicate error) | 2         | 0.98            | 0.49                 |                   |              | 0.7       |
|                                 |           |                 |                      |                   |              |           |
|                                 | N = 24    | Q2 = 0.648      |                      | Cond. no. = 8.551 |              |           |
|                                 | DF = 9    | R2 = 0.831      |                      | RSD = 0.5086      |              |           |
|                                 |           | R2 adj. = 0.568 |                      |                   |              |           |
|                                 |           |                 |                      |                   |              |           |
| <b>Duplication Time</b>         | <b>DF</b> | <b>SS</b>       | <b>MS (variance)</b> | <b>F</b>          | <b>p</b>     | <b>SD</b> |
| Total                           | 24        | 124.081         | 5.17003              |                   |              |           |
| Constant                        | 1         | 120.198         | 120.198              |                   |              |           |
|                                 |           |                 |                      |                   |              |           |
| Total corrected                 | 23        | 3.8822          | 0.168791             |                   |              | 0.410842  |
| Regression                      | 17        | 3.23952         | 0.19056              | 1.77906           | <b>0.245</b> | 0.436532  |
| Residual                        | 6         | 0.642678        | 0.107113             |                   |              | 0.327281  |
|                                 |           |                 |                      |                   |              |           |
| Lack of Fit<br>(Model error)    | 4         | 0.118211        | 0.0295527            | 0.112696          | <b>0.966</b> | 0.171909  |
| Pure error<br>(Replicate error) | 2         | 0.524467        | 0.262233             |                   |              | 0.512087  |
|                                 |           |                 |                      |                   |              |           |
|                                 | N = 24    | Q2 = 0.613      |                      | Cond. no. = 9.479 |              |           |
|                                 | DF = 6    | R2 = 0.834      |                      | RSD = 0.3273      |              |           |
|                                 |           | R2 adj. = 0.365 |                      |                   |              |           |
|                                 |           |                 |                      |                   |              |           |
